# Supplementary material for: Application of combined teaching method of case-based-learning and clinical pathway in practical gynecological teaching
Source: PeerJ journal article supplement (doi:10.7717/peerj.17813), 2024-07-24
Supplement: data.xlsx [file data.xlsx]

## Sheet: Data
Group	Age	Skill test score	Theoretical test scores	Total scores	Pre- internship skill test score	Score improvement in skill test	Pre- internship theoretical test scores	Score improvement in theoretical test	Pre- internship total scores
0	21	81	56	137	63	18	43	13	106
0	21	83	52	135	65	18	48	4	113
0	21	83	58	141	65	18	45	13	110
0	21	84	68	152	72	12	47	21	119
0	21	86	65	151	72	14	47	18	119
0	21	86	66	152	78	8	48	18	126
0	21	87	70	157	75	12	50	20	125
0	21	88	71	159	74	14	54	17	128
0	21	88	72	160	76	12	55	17	131
0	21	84	73	157	75	9	53	20	128
0	21	83	74	157	75	8	54	20	129
0	21	83	75	158	74	9	55	20	129
0	21	84	76	160	74	10	56	20	130
0	21	86	77	163	78	8	52	25	130
0	21	86	71	157	75	11	58	13	133
0	21	87	72	159	76	11	62	10	138
0	21	88	73	161	77	11	60	13	137
0	21	88	74	162	77	11	61	13	138
0	21	90	75	165	79	11	66	9	145
0	21	79	76	155	73	6	63	13	136
0	21	90	77	167	79	11	67	10	146
0	21	75	78	153	67	8	65	13	132
0	21	90	79	169	81	9	66	13	147
0	21	90	80	170	82	8	68	12	150
0	21	82	81	163	79	3	68	13	147
0	21	90	82	172	82	8	69	13	151
0	21	88	83	171	81	7	71	12	152
0	21	90	80	170	81	9	72	8	153
0	21	85	85	170	78	7	73	12	151
0	21	91	81	172	80	11	74	7	154
0	21	91	82	173	82	9	75	7	157
0	21	82	83	165	78	4	76	7	154
0	21	91	84	175	84	7	77	7	161
0	21	91	84	175	84	7	78	6	162
0	21	91	85	176	84	7	79	6	163
0	21	92	86	178	85	7	71	15	156
0	21	92	87	179	86	6	72	15	158
0	21	78	81	159	76	2	73	8	149
0	21	92	84	176	83	9	74	10	157
0	21	92	85	177	83	9	75	10	158
0	21	79	82	161	76	3	76	6	152
0	21	92	83	175	83	9	77	6	160
0	21	92	88	180	77	15	75	13	152
0	21	78	80	158	70	8	77	3	147
0	21	92	85	177	83	9	72	13	155
0	21	92	86	178	82	10	72	14	154
0	21	93	87	180	81	12	73	14	154
0	21	93	88	181	83	10	74	14	157
0	21	93	89	182	72	21	75	14	147
0	21	81	83	164	76	5	74	9	150
0	21	93	91	184	89	4	77	14	166
0	21	72	87	159	66	6	78	9	144
0	21	93	88	181	83	10	79	9	162
0	21	93	87	180	81	12	70	17	151
0	21	93	89	182	76	17	72	17	148
0	21	93	88	181	87	6	74	14	161
0	21	82	76	158	75	7	74	2	149
0	21	94	85	179	85	9	75	10	160
0	21	94	83	177	84	10	78	5	162
0	21	82	77	159	76	6	77	0	153
0	21	94	88	182	87	7	78	10	165
0	21	94	87	181	87	7	75	12	162
0	21	82	72	154	73	9	71	1	144
0	21	94	81	175	82	12	72	9	154
0	21	94	82	176	68	26	74	8	142
0	22	85	81	166	73	12	75	6	148
0	22	95	84	179	84	11	83	1	167
0	22	85	85	170	82	3	77	8	159
0	22	95	86	181	86	9	77	9	163
0	22	85	80	165	79	6	78	2	157
0	22	95	88	183	88	7	74	14	162
0	22	83	86	169	74	9	78	8	152
0	22	95	87	182	87	8	74	13	161
0	22	95	77	172	81	14	73	4	154
0	22	96	77	173	81	15	75	2	156
0	22	96	86	182	82	14	84	2	166
0	22	86	75	161	76	10	75	0	151
0	22	96	88	184	87	9	76	12	163
0	22	97	90	187	90	7	78	12	168
0	22	85	77	162	77	8	77	0	154
0	22	97	92	189	91	6	70	22	161
0	22	97	83	180	85	12	72	11	157
0	22	87	94	181	83	4	74	20	157
0	22	98	85	183	87	11	74	11	161
0	22	87	81	168	80	7	80	1	160
0	22	98	87	185	88	10	77	10	165
0	22	91	85	176	84	7	77	8	161
0	22	91	89	180	87	4	78	11	165
0	22	91	91	182	88	3	75	16	163
0	22	91	92	183	89	2	88	4	177
0	22	93	81	174	83	10	72	9	155
0	22	93	84	177	84	9	74	10	158
0	22	86	86	172	80	6	74	12	154
0	22	93	86	179	82	11	75	11	157
0	22	93	90	183	86	7	77	13	163
0	22	93	90	183	86	7	89	1	175
0	22	83	85	168	81	2	75	10	156
0	22	89	89	178	85	4	73	16	158
0	22	89	82	171	80	9	71	11	151
0	23	83	82	165	80	3	72	10	152
0	20	89	83	172	82	7	72	11	154
0	23	89	84	173	83	6	74	10	157
1	21	81	78	159	79	2	41	37	120
1	21	86	72	158	71	15	48	24	119
1	21	87	69	156	69	18	46	23	115
1	21	89	72	161	72	17	47	25	119
1	21	89	72	161	72	17	48	24	120
1	21	90	67	157	69	21	48	19	117
1	21	91	82	173	79	12	49	33	128
1	21	91	79	170	77	14	52	27	129
1	21	87	80	167	76	11	55	25	131
1	21	86	78	164	74	12	53	25	127
1	21	86	78	164	75	11	54	24	129
1	21	87	79	166	76	11	55	24	131
1	21	89	80	169	77	12	56	24	133
1	21	89	81	170	77	12	52	29	129
1	21	90	83	173	79	11	58	25	137
1	21	91	85	176	81	10	62	23	143
1	21	91	77	168	76	15	60	17	136
1	21	93	87	180	83	10	61	26	144
1	21	93	87	180	83	10	66	21	149
1	21	93	89	182	84	9	63	26	147
1	21	93	85	178	82	11	67	18	149
1	21	93	84	177	83	10	65	19	148
1	21	93	83	176	80	13	66	17	146
1	21	93	89	182	80	13	68	21	148
1	21	93	85	178	81	12	68	17	149
1	21	93	88	181	82	11	69	19	151
1	21	93	87	180	82	11	71	16	153
1	21	94	88	182	80	14	72	16	152
1	21	94	89	183	82	12	73	16	155
1	22	94	90	184	82	12	74	16	156
1	22	94	91	185	77	17	75	16	152
1	22	94	92	186	80	14	76	16	156
1	22	94	84	178	79	15	77	7	156
1	22	94	88	182	78	16	78	10	156
1	22	95	89	184	82	13	79	10	161
1	22	95	90	185	78	17	71	19	149
1	22	95	91	186	83	12	72	19	155
1	22	95	92	187	75	20	73	19	148
1	22	95	93	188	87	8	74	19	161
1	22	95	89	184	78	17	75	14	153
1	22	95	90	185	85	10	76	14	161
1	22	95	91	186	82	13	77	14	159
1	22	95	92	187	89	6	75	17	164
1	22	95	90	185	83	12	77	13	160
1	22	95	89	184	78	17	72	17	150
1	22	96	90	186	83	13	72	18	155
1	22	96	89	185	82	14	73	16	155
1	22	96	92	188	81	15	74	18	155
1	22	96	93	189	92	4	75	18	167
1	22	96	94	190	82	14	74	20	156
1	22	96	95	191	79	17	77	18	156
1	22	96	92	188	77	19	78	14	155
1	22	96	88	184	75	21	79	9	154
1	22	96	89	185	76	20	70	19	146
1	22	96	87	183	75	21	72	15	147
1	22	97	92	189	80	17	74	18	154
1	22	97	93	190	78	19	74	19	152
1	22	97	94	191	79	18	75	19	154
1	22	97	95	192	80	17	78	17	158
1	22	97	89	186	82	15	77	12	159
1	22	97	97	194	78	19	78	19	156
1	22	97	93	190	80	17	75	18	155
1	22	97	92	189	78	19	71	21	149
1	22	97	89	186	75	22	72	17	147
1	22	98	86	184	84	14	74	12	158
1	23	98	87	185	90	8	80	7	170
1	23	98	88	186	82	16	75	13	157
1	21	98	89	187	75	23	77	12	152
1	21	98	90	188	78	20	77	13	155
1	21	98	91	189	76	22	78	13	154
1	21	98	92	190	70	28	74	18	144
1	21	98	92	190	88	10	86	6	174
1	21	98	91	189	82	16	74	17	156
1	21	99	90	189	79	20	73	17	152
1	21	99	94	193	82	17	84	10	166
1	21	99	92	191	80	19	75	17	155
1	21	99	93	192	80	19	76	17	156
1	21	98	95	193	82	16	76	19	158
1	21	98	98	196	83	15	78	20	161
1	21	98	96	194	79	19	79	17	158
1	21	98	94	192	78	20	70	24	148
1	21	99	98	197	77	22	72	26	149
1	21	99	98	197	79	20	74	24	153
1	21	99	98	197	83	16	74	24	157
1	21	99	99	198	84	15	86	13	170
1	21	94	91	185	73	21	77	14	150
1	21	94	90	184	85	9	77	13	162
1	21	94	94	188	78	16	78	16	156
1	21	94	88	182	84	10	75	13	159
1	21	96	96	192	78	18	89	7	167
1	21	96	97	193	87	9	72	25	159
1	21	96	92	188	83	13	74	18	157
1	21	96	89	185	78	18	74	15	152
1	21	96	92	188	70	26	75	17	145
1	21	96	96	192	83	13	77	19	160
1	21	92	97	189	79	13	79	18	158
1	21	92	81	173	79	13	75	6	154
1	21	92	82	174	78	14	73	9	151
1	21	92	89	181	76	16	71	18	147
1	21	92	86	178	79	13	72	14	151
1	21	92	84	176	80	12	72	12	152
1	21	92	90	182	84	8	74	16	158
1	21	91	84	175	80	11	76	8	156
1	21	91	87	178	82	9	76	11	158
