# Supplementary material for: Application of combined teaching method of case-based-learning and clinical pathway in practical gynecological teaching
Source: PeerJ journal article supplement (doi:10.7717/peerj.17813), 2024-07-24
Supplement: Data_of_Questionnaire.xls [file Data_of_Questionnaire.xls]

## Sheet: Sheet1
			Pre-internship questionnaire						Post-internship questionnaire
GROUP	Age	Gender： Female（ 0）Male（1）	Are you familiar with our internship process? Yes (1), No (0)	Are you interested in gynecology? Yes (1), No (0)	Are you confident that you can master gynecological knowledge through internship? Yes (1), No (0)	Are you willing to participate in the production and explanation of courseware under the guidance of the teacher during the internship? Yes (1), No (0)	Will you follow the rules and regulations of the internship? Yes (1), No (0)	Do you think you will become an obstetrician and gynecologist in the future? Yes (1), No (0), I do not know(2)	Your satisfaction with the practice teaching in this department (5 is the most satisfactory)	Do you think the learning goals of the internship process are clear? Yes (1), No (0)	Has your independent learning ability improved during the internship? Yes (1), No (0)	Has your enthusiasm for learning increased during the internship? Yes (1), No (0)	Do you think you have improved your oral skills? Yes (1), No (0)	Do you think it improves the ability of summarization and helps combine textbook knowledge with clinical practice? Yes (1), No (0)	Do you think it can improve the understanding of the theoretical knowledge ? Yes (1), No (0)	Do you think it can help consolidate clinical knowledge? Yes (1), No (0)	Do you think it can improve doctor‒patient communication skills? Yes (1), No (0)	Do you think that the teaching method of CBL combined with clinical pathway takes up too much teaching time, and you prefer to let the teacher explain directly? Yes (1), No (0)	Do you think it is necessary to carry out more such teaching in the future ? Yes (1), No (0)	Do you have any suggestions for the following internship?
0	21	1	1	1	1	1	1	1	5	1	0	1	1	1	1	1	1
0	21	1	1	1	1	1	1	1	5	1	0	1	1	1	1	1	1
0	21	1	1	1	1	1	1	1	5	1	0	1	1	1	1	1	1
0	21	1	1	1	1	1	1	1	5	1	0	1	1	1	1	1	1
0	21	1	1	1	1	1	1	0	5	1	0	1	1	1	1	1	1
0	21	1	1	1	1	1	1	0	5	1	0	1	1	1	1	1	1
0	21	1	1	1	1	1	1	0	5	1	0	1	1	1	1	1	1
0	21	1	1	1	1	1	1	0	5	1	0	1	1	1	1	1	1
0	21	1	1	1	1	1	1	0	5	1	1	1	1	1	1	1	1
0	21	1	1	1	1	1	1	0	5	1	1	1	1	1	1	1	1
0	21	1	1	1	1	1	1	0	5	1	1	1	1	1	1	1	1
0	21	1	1	1	1	1	1	0	5	1	1	1	1	1	1	1	1
0	21	1	1	1	1	1	1	0	5	1	1	1	1	1	1	1	1
0	21	1	1	1	1	1	1	0	5	1	1	1	1	1	1	1	1
0	21	1	1	1	1	1	1	0	5	1	1	1	1	1	1	1	1
0	21	1	1	1	1	1	1	0	5	1	1	1	1	1	1	1	1
0	21	1	1	1	1	1	1	0	5	1	1	1	1	1	1	1	1
0	21	1	1	1	1	1	1	0	5	1	1	1	1	1	1	1	1
0	21	1	1	1	1	1	1	0	5	1	1	1	1	1	1	1	1
0	21	1	1	1	1	1	1	0	5	1	1	1	1	1	1	1	1
0	21	1	1	1	1	1	1	0	5	1	1	1	1	1	1	1	1
0	21	1	1	1	1	1	1	0	4	1	1	1	1	1	1	1	1
0	21	1	1	1	1	1	1	0	4	1	1	1	1	1	1	1	1
0	21	1	1	1	1	1	1	0	4	1	1	1	1	1	1	1	1
0	21	1	1	1	1	1	1	0	4	1	1	1	1	1	1	1	1
0	21	1	1	1	1	1	1	0	4	1	1	1	1	1	1	1	1
0	21	1	1	1	1	1	1	0	4	1	1	1	1	1	1	1	1
0	21	1	1	1	1	1	1	0	4	1	1	1	1	1	1	1	1
0	21	1	1	1	1	1	1	0	4	1	1	1	1	1	1	1	1
0	21	1	1	1	1	1	1	0	4	1	1	1	1	1	1	1	1
0	21	1	1	1	1	1	1	0	4	1	1	1	1	1	1	1	1
0	21	1	1	1	1	1	1	0	4	1	1	1	1	1	1	1	1
0	21	1	1	1	1	1	1	0	4	1	1	1	1	1	1	1	1
0	21	1	1	1	1	1	1	0	4	1	1	1	1	1	1	1	1
0	21	1	1	1	1	1	1	0	4	1	1	1	1	1	1	1	1
0	21	1	1	1	1	1	1	0	4	1	1	1	1	1	1	1	1
0	21	1	1	1	1	1	1	0	4	1	1	1	1	1	1	1	1
0	21	1	1	1	1	1	1	0	4	1	1	1	1	1	1	1	1
0	21	1	1	1	1	1	1	0	4	1	1	1	1	1	1	1	1
0	21	1	1	1	1	1	1	0	4	1	1	1	1	1	1	1	1
0	21	1	1	1	1	1	1	0	4	1	1	1	1	1	1	1	1
0	21	1	1	1	1	1	1	0	4	1	1	1	1	1	1	1	1
0	21	1	1	1	1	1	1	0	4	1	1	1	1	1	1	1	1
0	21	1	1	1	1	1	1	0	4	1	1	1	1	1	1	1	1
0	21	1	1	1	1	1	1	0	4	1	1	1	1	1	1	1	1
0	21	1	1	1	1	1	1	0	4	1	1	1	1	1	1	1	1
0	21	1	1	1	1	1	1	0	4	1	1	1	1	1	1	1	1
0	21	1	1	1	1	1	1	0	4	1	1	1	1	1	1	1	1
0	21	1	1	1	1	1	1	0	4	1	1	1	1	1	1	1	1
0	21	0	1	1	1	1	1	0	4	1	1	1	1	1	1	1	1
0	21	0	1	1	1	1	1	0	4	1	1	1	1	1	1	1	1
0	21	0	1	1	1	1	1	0	3	1	1	1	1	1	1	1	1
0	21	0	1	1	1	1	1	0	3	1	1	1	1	1	1	1	1
0	21	0	1	1	1	1	1	0	3	1	1	1	1	1	1	1	1
0	21	0	1	1	1	1	1	0	3	1	1	1	1	1	1	0	1
0	21	0	1	1	1	1	1	0	3	1	1	1	1	1	1	0	1
0	21	0	1	0	1	1	1	0	3	1	1	1	1	1	1	0	1
0	21	0	1	0	1	1	1	0	3	1	1	1	1	1	1	0	1
0	21	0	1	0	1	1	1	0	3	1	1	1	1	1	0	0	0
0	21	0	1	0	1	1	1	0	3	1	1	1	1	1	0	0	0
0	21	0	1	0	1	1	1	0	3	1	1	1	1	1	0	0	0
0	21	0	1	0	1	1	1	0	3	1	1	1	1	1	0	0	0
0	21	0	1	0	1	1	1	2	3	1	1	1	1	1	0	0	0
0	21	0	1	0	1	1	1	2	3	1	1	1	1	1	0	0	0
0	21	0	1	0	1	1	1	2	3	1	1	1	1	1	0	0	0
0	22	0	1	0	1	1	1	2	3	1	1	1	1	1	0	0	0
0	22	0	1	0	1	1	1	2	3	1	1	1	1	1	0	0	0
0	22	0	1	0	1	1	1	2	3	1	1	1	1	1	0	0	0
0	22	0	1	0	1	1	1	2	3	1	1	1	1	1	0	0	0
0	22	0	1	0	1	1	1	2	3	1	1	1	1	1	0	0	0
0	22	0	1	0	1	1	1	2	3	1	1	1	1	1	0	0	0
0	22	0	1	0	1	1	1	2	3	0	1	1	1	1	0	0	0
0	22	0	1	0	1	1	1	2	3	0	1	1	1	1	0	0	0
0	22	0	1	0	1	1	1	2	3	0	1	1	1	1	0	0	0
0	22	0	1	0	1	1	1	2	3	0	1	1	1	1	0	0	0
0	22	0	1	0	1	1	1	2	3	0	0	1	1	1	0	0	0
0	22	0	1	0	1	1	1	2	3	0	0	1	1	1	0	0	0
0	22	0	1	0	1	1	1	2	3	0	0	1	1	1	0	0	0
0	22	0	1	0	1	1	1	2	3	0	0	0	1	1	0	0	0
0	22	0	1	0	1	1	1	2	3	0	0	0	1	1	0	0	0
0	22	0	1	0	1	1	1	2	3	0	0	0	1	1	0	0	0
0	22	0	1	0	1	1	1	2	3	0	0	0	1	1	0	0	0
0	22	0	1	0	1	1	1	2	3	0	0	0	0	1	0	0	0
0	22	0	1	0	1	1	1	2	3	0	0	0	0	1	0	0	0
0	22	0	1	0	1	1	1	2	3	0	0	0	0	0	0	0	0
0	22	0	1	0	1	1	1	2	3	0	0	0	0	0	0	0	0
0	22	0	1	0	1	1	1	2	3	0	0	0	0	0	0	0	0
0	22	0	1	0	1	1	1	2	3	0	0	0	0	0	0	0	0
0	22	0	1	0	1	1	1	2	3	0	0	0	0	0	0	0	0
0	22	0	0	0	1	1	1	2	3	0	0	0	0	0	0	0	0
0	22	0	0	0	1	1	1	2	3	0	0	0	0	0	0	0	0
0	22	0	0	0	1	1	1	2	3	0	0	0	0	0	0	0	0
0	22	0	0	0	0	1	1	2	3	0	0	0	0	0	0	0	0
0	22	0	0	0	0	1	1	2	3	0	0	0	0	0	0	0	0
0	22	0	0	0	0	1	1	2	3	0	0	0	0	0	0	0	0
0	22	0	0	0	0	1	1	2	3	0	0	0	0	0	0	0	0
0	22	0	0	0	0	1	1	2	3	0	0	0	0	0	0	0	0
0	22	0	0	0	0	1	1	2	3	0	0	0	0	0	0	0	0
0	22	0	0	0	0	1	1	2	3	0	0	0	0	0	0	0	0
0	23	0	0	0	0	1	1	2	3	0	0	0	0	0	0	0	0
0	20	0	0	0	0	1	1	2	2	0	0	0	0	0	0	0	0
0	23	0	0	0	0	1	1	2	2	0	0	0	0	0	0	0	0
1	21	1	0	0	0	1	1	1	5	0	0	0	0	1	0	0	0	1	1
1	21	1	0	0	0	1	1	1	5	0	0	0	0	1	0	0	0	1	1
1	21	1	0	0	0	1	1	1	5	0	0	0	0	1	0	0	0	1	1
1	21	1	0	0	0	1	1	0	5	0	0	0	0	1	0	0	0	1	1
1	21	1	0	0	0	1	1	0	5	0	0	0	0	1	0	0	0	1	1
1	21	1	0	0	0	1	1	0	5	0	0	0	0	1	0	0	0	1	1
1	21	1	0	0	0	1	1	0	5	0	0	0	0	1	0	0	0	1	1
1	21	1	0	0	0	1	1	0	5	0	0	0	0	1	0	0	0	1	1
1	21	1	0	0	0	1	1	0	5	0	0	0	1	1	0	0	0	1	1
1	21	1	0	0	0	1	1	0	5	0	1	0	1	1	0	0	0	1	1
1	21	1	0	0	0	1	1	0	5	0	1	0	1	1	0	0	0	1	1
1	21	1	0	0	0	1	1	0	5	0	1	1	1	1	0	0	0	1	1
1	21	1	0	0	0	1	1	0	5	0	1	1	1	1	0	0	0	1	1
1	21	1	0	0	0	1	1	0	5	0	1	1	1	1	0	0	0	1	1
1	21	1	0	0	1	1	1	0	5	0	1	1	1	1	0	0	0	1	1
1	21	1	0	0	1	1	1	0	5	1	1	1	1	1	0	0	0	1	1
1	21	1	0	0	1	1	1	0	5	1	1	1	1	1	0	0	0	1	1
1	21	1	1	0	1	1	1	0	5	1	1	1	1	1	0	0	0	1	1
1	21	1	1	0	1	1	1	0	5	1	1	1	1	1	1	0	1	1	1
1	21	1	1	0	1	1	1	0	5	1	1	1	1	1	1	0	1	1	1
1	21	1	1	0	1	1	1	0	5	1	1	1	1	1	1	0	1	1	1
1	21	1	1	0	1	1	1	0	5	1	1	1	1	1	1	0	1	1	1
1	21	1	1	0	1	1	1	0	5	1	1	1	1	1	1	0	1	1	1
1	21	1	1	0	1	1	1	0	5	1	0	1	1	1	1	0	1	0	1
1	21	1	1	0	1	1	1	0	5	1	0	1	1	1	1	0	1	0	1
1	21	1	1	0	1	1	1	0	5	1	1	1	1	1	1	0	1	0	1
1	21	1	1	0	1	1	1	0	5	1	1	1	1	1	1	1	1	0	1
1	21	1	1	0	1	1	1	0	5	1	1	1	1	1	1	1	1	0	1
1	21	1	1	0	1	1	1	0	5	1	1	1	1	1	1	1	1	0	1
1	22	1	1	0	1	1	1	0	5	1	1	1	1	1	1	1	1	0	1
1	22	1	1	0	1	1	1	0	5	1	1	1	1	1	1	1	1	0	1
1	22	1	1	0	1	1	1	0	5	1	1	1	1	1	1	1	1	0	1
1	22	1	1	0	1	1	1	0	5	1	1	1	1	1	1	1	1	0	1
1	22	1	1	0	1	1	1	0	5	1	1	1	1	1	1	1	1	0	1
1	22	1	1	0	1	1	1	0	5	1	1	1	1	1	1	1	1	0	1
1	22	1	1	0	1	1	1	0	5	1	1	1	1	1	1	1	1	0	1
1	22	1	1	0	1	1	1	0	5	1	1	1	1	1	1	1	1	0	1
1	22	1	1	0	1	1	1	0	5	1	1	1	1	1	1	1	1	0	1
1	22	1	1	0	1	1	1	0	5	1	1	1	1	1	1	1	1	0	1
1	22	1	1	0	1	1	1	0	5	1	1	1	1	1	1	1	1	0	1
1	22	1	1	0	1	1	1	0	5	1	1	1	1	1	1	1	1	0	1
1	22	1	1	0	1	1	1	0	5	1	1	1	1	1	1	1	1	0	1
1	22	1	1	0	1	1	1	0	5	1	1	1	1	1	1	1	1	0	1
1	22	1	1	0	1	1	1	0	5	1	1	1	1	1	1	1	1	0	1
1	22	1	1	0	1	1	1	0	5	1	1	1	1	1	1	1	1	0	1
1	22	1	1	0	1	1	1	0	5	1	1	1	1	1	1	1	1	0	1
1	22	1	1	0	1	1	1	0	5	1	1	1	1	1	1	1	1	0	1
1	22	1	1	0	1	1	1	0	5	1	1	1	1	1	1	1	1	0	1
1	22	0	1	0	1	1	1	0	5	1	1	1	1	1	1	1	1	0	1
1	22	0	1	1	1	1	1	0	5	1	1	1	1	1	1	1	1	0	1
1	22	0	1	1	1	1	1	0	5	1	1	1	1	1	1	1	1	0	1
1	22	0	1	1	1	1	1	0	5	1	1	1	1	1	1	1	1	0	1
1	22	0	1	1	1	1	1	0	5	1	1	1	1	1	1	1	1	0	1
1	22	0	1	1	1	1	1	0	5	1	1	1	1	1	1	1	1	0	1
1	22	0	1	1	1	1	1	0	5	1	1	1	1	1	1	1	1	0	1
1	22	0	1	1	1	1	1	0	5	1	1	1	1	1	1	1	1	0	1
1	22	0	1	1	1	1	1	0	5	1	1	1	1	1	1	1	1	0	1
1	22	0	1	1	1	1	1	0	5	1	1	1	1	1	1	1	1	0	1
1	22	0	1	1	1	1	1	0	5	1	1	1	1	1	1	1	1	0	1
1	22	0	1	1	1	1	1	2	5	1	0	1	1	1	1	1	1	0	1
1	22	0	1	1	1	1	1	2	5	1	1	1	1	1	1	1	1	0	1
1	22	0	1	1	1	1	1	2	5	1	1	1	1	1	1	1	1	0	1
1	22	0	1	1	1	1	1	2	5	1	1	1	1	1	1	1	1	0	1
1	22	0	1	1	1	1	1	2	5	1	1	1	1	1	1	1	1	0	1
1	22	0	1	1	1	1	1	2	5	1	1	1	1	1	1	1	1	0	1
1	23	0	1	1	1	1	1	2	5	1	1	1	1	1	1	1	1	0	1
1	23	0	1	1	1	1	1	2	5	1	1	1	1	1	1	1	1	0	1
1	21	0	1	1	1	1	1	2	5	1	1	1	1	1	1	1	1	0	1
1	21	0	1	1	1	1	1	2	5	1	1	1	1	1	1	1	1	0	1
1	21	0	1	1	1	1	1	2	5	1	1	1	1	1	1	1	1	0	1
1	21	0	1	1	1	1	1	2	5	1	1	1	1	1	1	1	1	0	1
1	21	0	1	1	1	1	1	2	5	1	1	1	1	1	1	1	1	0	1
1	21	0	1	1	1	1	1	2	5	1	1	1	1	1	1	1	1	0	1
1	21	0	1	1	1	1	1	2	5	1	1	1	1	1	1	1	1	0	1
1	21	0	1	1	1	1	1	2	5	1	1	1	1	1	1	1	1	0	1
1	21	0	1	1	1	1	1	2	5	1	1	1	1	1	1	1	1	0	1
1	21	0	1	1	1	1	1	2	5	1	1	1	1	1	1	1	1	0	1
1	21	0	1	1	1	1	1	2	5	1	1	1	1	1	1	1	1	0	1
1	21	0	1	1	1	1	1	2	5	1	1	1	1	1	1	1	1	0	1
1	21	0	1	1	1	1	1	2	5	1	1	1	1	1	1	1	1	0	1
1	21	0	1	1	1	1	1	2	5	1	1	1	1	1	1	1	1	0	1
1	21	0	1	1	1	1	1	2	5	1	1	1	1	1	1	1	1	0	1
1	21	0	1	1	1	1	1	2	5	1	1	1	1	1	1	1	1	0	1
1	21	0	1	1	1	1	1	2	5	1	1	1	1	1	1	1	1	0	1
1	21	0	1	1	1	1	1	2	5	1	1	1	1	1	1	1	1	0	1
1	21	0	1	1	1	1	1	2	5	1	1	1	1	1	1	1	1	0	1
1	21	0	1	1	1	1	1	2	5	1	1	1	1	1	1	1	1	0	1
1	21	0	1	1	1	1	1	2	5	1	1	1	1	1	1	1	1	0	1
1	21	0	1	1	1	1	1	2	5	1	1	1	1	1	1	1	1	0	1
1	21	0	1	1	1	1	1	2	5	1	1	1	1	1	1	1	1	0	1
1	21	0	1	1	1	1	1	2	5	1	1	1	1	0	1	1	1	0	1
1	21	0	1	1	1	1	1	2	5	1	1	1	1	0	1	1	1	0	0
1	21	0	1	1	1	1	1	2	4	1	1	1	1	0	1	1	1	0	0
1	21	0	1	1	1	1	1	2	4	1	1	1	1	0	1	1	1	0	0
1	21	0	1	1	1	1	1	2	4	1	1	1	1	0	1	1	1	0	0
1	21	0	1	1	1	1	1	2	4	1	1	1	1	0	1	1	1	0	0
1	21	0	1	1	1	1	1	2	4	1	1	1	1	0	1	1	1	0	0
1	21	0	1	1	1	1	1	2	3	1	1	1	1	0	1	1	1	0	0
1	21	0	1	1	1	1	1	2	3	1	1	1	1	0	1	1	1	0	0
1	21	0	1	1	1	1	1	2	3	1	1	1	1	0	1	1	1	0	0
1	21	0	1	1	1	1	1	2	3	1	1	1	1	0	1	1	1	0	0
1	21	0	1	1	1	1	1	2	3	1	1	1	1	0	1	1	1	0	0
1	21	0	1	1	1	1	1	2	2	1	1	1	1	0	1	1	1	0	0
1	21	0	1	1	1	1	1	2	2	1	1	1	1	0	1	1	1	0	0
