# Supplementary material for: Application of combined teaching method of case-based-learning and clinical pathway in practical gynecological teaching
Source: PeerJ journal article supplement (doi:10.7717/peerj.17813), 2024-07-24
Supplement: English_version_of_the_questionnaires.doc [file English_version_of_the_questionnaires.doc]

| **Jiaxing Maternity and Child Health Care Hospital**  **Questionnaire before internship in department of gynecology** | | |
| --- | --- | --- |
| Gender: □ female □ male  Date of birth：  Year of enrollment: | | |
| 1 | Are you familiar with our internship process? | A. Yes B. No |
| 2 | Are you interested in gynecology? | A. Yes B. No |
| 3 | Are you confident that you can master gynecological knowledge through internship? | A. Yes B. No |
| 4 | Are you willing to participate in the production and explanation of courseware under the guidance of the teacher during the internship? | A. Yes B. No |
| 5 | Will you follow the rules and regulations of the internship? | A. Yes B. No |
| 6 | Do you think you will become an obstetrician and gynecologist in the future? | Yes B. No  C. I do not know. |
| 7 | Do you have any requirements and suggestions for the following internship? |  |
| Date of filling: | | |

| **Jiaxing Maternity and Child Health Care Hospital**  **Questionnaire after internship in department of gynecology** | | |
| --- | --- | --- |
| Gender: □ female □ male  Date of birth：  Year of enrollment: | | |
| 1 | Your satisfaction with the practice teaching in this department (5 is the most satisfactory) | A5 B.4 C.3 D.2 E.1 |
| 2 | Do you think the learning goals of the internship process are clear? | A. Yes B. No |
| 3 | Has your independent learning ability improved during the internship? | A. Yes B. No |
| 4 | Has your enthusiasm for learning increased during the internship? | A. Yes B. No |
| 5 | Do you think you have improved your oral skills？ | A. Yes B. No |
| 6 | Do you think it improves the ability of summarization and helps combine textbook knowledge with clinical practice? | A. Yes B. No |
| 7 | Do you think it can improve the understanding of the theoretical knowledge ? | A. Yes B. No |
| 8 | Do you think it can help consolidate clinical knowledge? | A. Yes B. No |
| 9 | Do you think it can improve doctor‒patient communication skills? | A. Yes B. No |
| 10 | Do you think that the teaching method of CBL combined with clinical pathway takes up too much teaching time, and you prefer to let the teacher explain directly? | A. Yes B. No |
| 11 | Do you think it is necessary to carry out more such teaching in the future? | A. Yes B. No |
| 12 | Do you have any suggestions for the following internship? |  |
| Date of filling: | | |
